# Supplementary material for: Two Akabane virus glycoprotein Gc domains induce neutralizing antibodies in mice
Source: PubMed Central journal article supplement — J Vet Med Sci. 2022 Feb 23;84(4):538–42. doi: 10.1292/jvms.21-0670 (PMC9096034; doi:10.1292/jvms.21-0670), 2022-02-23
Supplement: jvms-84-538-s001.pdf [file jvms-84-538-s001.pdf]

Supplementary Table 1. Primers used in this study.

| Name                  | Sequence (5'-3') <sup>1</sup>   | Position <sup>2</sup> |
|-----------------------|---------------------------------|-----------------------|
| Gc-1F_ <i>SacI</i>    | ggggagctcGCTTGCATACAAGAAAA      | 1418-1434             |
| Gc-291R_ <i>PstI</i>  | aactgcagttaTGGTCCTGCTGACGCCAA   | 1708-1691             |
| Gc-274F_ <i>SacI</i>  | ggggagctcTTGGCGTCAGCAGGACCA     | 1691-1708             |
| Gc-582R_ <i>PstI</i>  | aactgcagttaATTCAAGACATGCAATGA   | 1999-1982             |
| Gc-565F_ <i>SacI</i>  | ggggagctcTCATTGCATGTCTTGAATAA   | 1982-2001             |
| Gc-954R_ <i>SalI</i>  | acgcgtcgacttaATTCTCGTCTATCACCA  | 2371-2355             |
| Gc-1191R_ <i>PstI</i> | aactgcagttaAGGGTAGCAATCTAGGTC   | 2608-2591             |
| Gc-1174F_ <i>SacI</i> | ggggagctcGACCTAGATTGCTACCCT     | 2591-2608             |
| Gc-1665R_ <i>PstI</i> | aactgcaGAAGGTTAGCCAATTATCCTT    | 3082-3062             |
| Gc-1555F_ <i>SacI</i> | ggggagctcAATCATGAGTACAAGACAGG   | 2972-2991             |
| Gc-2811R_ <i>KpnI</i> | gggtaccTTATTTTCAGCTTATTTTCTAA   | 4228-4208             |
| Fusion-F              | AGCAGGACCA TCATTGCATGTCTTGAATAA | 1699-1708, 1982-2001  |
| Fusion-R              | AGACATGCAATGA TGGTCCTGCTGACGCCA | 1994-1982, 1708-1692  |

<sup>1</sup>Restriction sites are underlined. Nucleotides that correspond to AKAV sequences are indicated in capitals.

<sup>2</sup>Numbers indicate the position of the gene encoding the Gc protein (1418-4228, GenBank accession number AB100604).
